# Supplementary material for: Predicting the risk of cardiovascular and cerebrovascular event in systemic lupus erythematosus: a Chinese SLE treatment and research group study XXVI
Source: PubMed Central journal article supplement — RMD Open. 2024 Sep 23;10(3):e004425. doi: 10.1136/rmdopen-2024-004425 (PMC11418496; doi:10.1136/rmdopen-2024-004425), 2024-09-23
Supplement: rmdopen-10-3-s001.pdf [file rmdopen-10-3-s001.pdf]

### **Selection of candidate variables**

Clinical data of baseline evaluation of Chinese Systemic Lupus Erythematosus Treatment and Research Group (CSTAR) cohorts included 117 variables. Literature review was carried out to identify the potential predictors with sufficient evidence. Each variable was measured by a rheumatologist and cardiologist separately to determine predictive value. Both traditional risk factors of CCE and variables related to SLE were assessed and included. Finally, 21 binary candidates were selected, including male, age of SLE onset >40, obesity, hypertension, diabetes mellitus, hyperlipidemia, smoking, arthritis, serositis, oral or nasal ulcers, cutaneous involvement, nonscarring alopecia, lupus nephritis, neuropsychiatric SLE, thrombocytopenia, leukopenia, lupus anticoagulant, anticardiolipin antibodies, anti- $\beta$ 2GPI antibodies, high dose glucocorticoids, and utilization of HCQ. The definition of the 21 candidates is presented in Supplementary Table 1.

**Supplementary Table 1 Definitions of the variables in this study**

| <b>Variables</b>          | <b>Definitions</b>                                                                                                                                                                                              | <b>Coding</b>                                                         |
|---------------------------|-----------------------------------------------------------------------------------------------------------------------------------------------------------------------------------------------------------------|-----------------------------------------------------------------------|
| Male gender               | -                                                                                                                                                                                                               | Binary (male = 1, female = 0)                                         |
| Age of SLE onset >40      | The age of the patients when they presented with SLE.                                                                                                                                                           | Binary (yes = 1, no =0)                                               |
| Obesity                   | Body mass index (BMI) $\geq 28$ kg/m <sup>2</sup> .                                                                                                                                                             |                                                                       |
| Hypertension              | Without the use of antihypertensive drugs, more than 3 non-consecutive measurements on different days, a systolic blood pressure of $\geq 140$ mmHg (or) diastolic blood pressure of $\geq 90$ mmHg at baseline |                                                                       |
| Hyperlipidemia            | Total cholesterol level $\geq 5.17$ mmol/L, low-density lipoprotein cholesterol (LDL-c) level $\geq 3.36$ mmol/L, or triglyceride level $\geq 2.26$ mmol/L <sup>1</sup>                                         |                                                                       |
| Diabetes mellitus         | Diagnosed with diabetes mellitus before or at the baseline according to the American Diabetes Association (ADA) guidelines <sup>2</sup> .                                                                       |                                                                       |
| Smoke                     | The patients' self-reported smoking at baseline.                                                                                                                                                                |                                                                       |
| Arthritis                 | According to the 2012 SLICC classification criteria <sup>3</sup> .                                                                                                                                              |                                                                       |
| Serositis                 |                                                                                                                                                                                                                 |                                                                       |
| Oral or nasal ulcers      |                                                                                                                                                                                                                 |                                                                       |
| Cutaneous                 |                                                                                                                                                                                                                 |                                                                       |
| Nonscarring alopecia      |                                                                                                                                                                                                                 |                                                                       |
| Nephritis                 |                                                                                                                                                                                                                 |                                                                       |
| Neuropsychiatric SLE      |                                                                                                                                                                                                                 |                                                                       |
| Thrombocytopenia          |                                                                                                                                                                                                                 |                                                                       |
| Leukopenia                |                                                                                                                                                                                                                 |                                                                       |
| LA                        |                                                                                                                                                                                                                 |                                                                       |
| ACL                       |                                                                                                                                                                                                                 |                                                                       |
| Anti- $\beta 2$ GP1       |                                                                                                                                                                                                                 |                                                                       |
| High dose glucocorticoids |                                                                                                                                                                                                                 | A daily dose of GC prednisone equivalent $\geq 1$ mg/kg/d at baseline |
| HCQ                       | Utilization of hydroxychloroquine at baseline                                                                                                                                                                   |                                                                       |

**Supplementary Table 2 Selection of variables for the prediction model**

|                           | HR (95%CI)                | P value | B coefficient |
|---------------------------|---------------------------|---------|---------------|
| Age of SLE onset >40      | 4.1297 (2.6957-6.3265)    | < 0.001 | 1.418197282   |
| Anti $\beta$ 2GP1         | 2.4455 (1.3459-4.4435)    | 0.0033  | 0.89426093    |
| Arthritis                 | 0.44373 (0.25714-0.76571) | 0.0035  | -0.81253799   |
| High dose glucocorticoids | 2.0266 (1.17-3.5103)      | 0.012   | 0.706374506   |
| HCQ                       | 0.5932 (0.3885-0.90575)   | 0.016   | -0.522220222  |
| Smoking                   | 2.4781 (1.1514-5.3334)    | 0.02    | 0.907500032   |
| Cutaneous                 | 0.53586 (0.30246-0.94937) | 0.033   | -0.623886026  |
| Hypertension              | 1.708 (1.0258-2.8438)     | 0.04    | 0.535327308   |
| Male                      | 1.8639 (1.0212-3.402)     | 0.043   | 0.622674978   |
| Obesity                   | 1.429 (0.83249-2.4529)    | 0.2     | 0.356971639   |
| Thrombocytopenia          | 1.2121 (0.74139-1.9818)   | 0.44    | 0.192387071   |
| LA                        | 1.2376 (0.53792-2.8475)   | 0.62    | 0.213200297   |
| ACL                       | 1.1344 (0.5986-2.1498)    | 0.7     | 0.126104499   |

### Supplementary Figure 1 Formula of the prognostic index

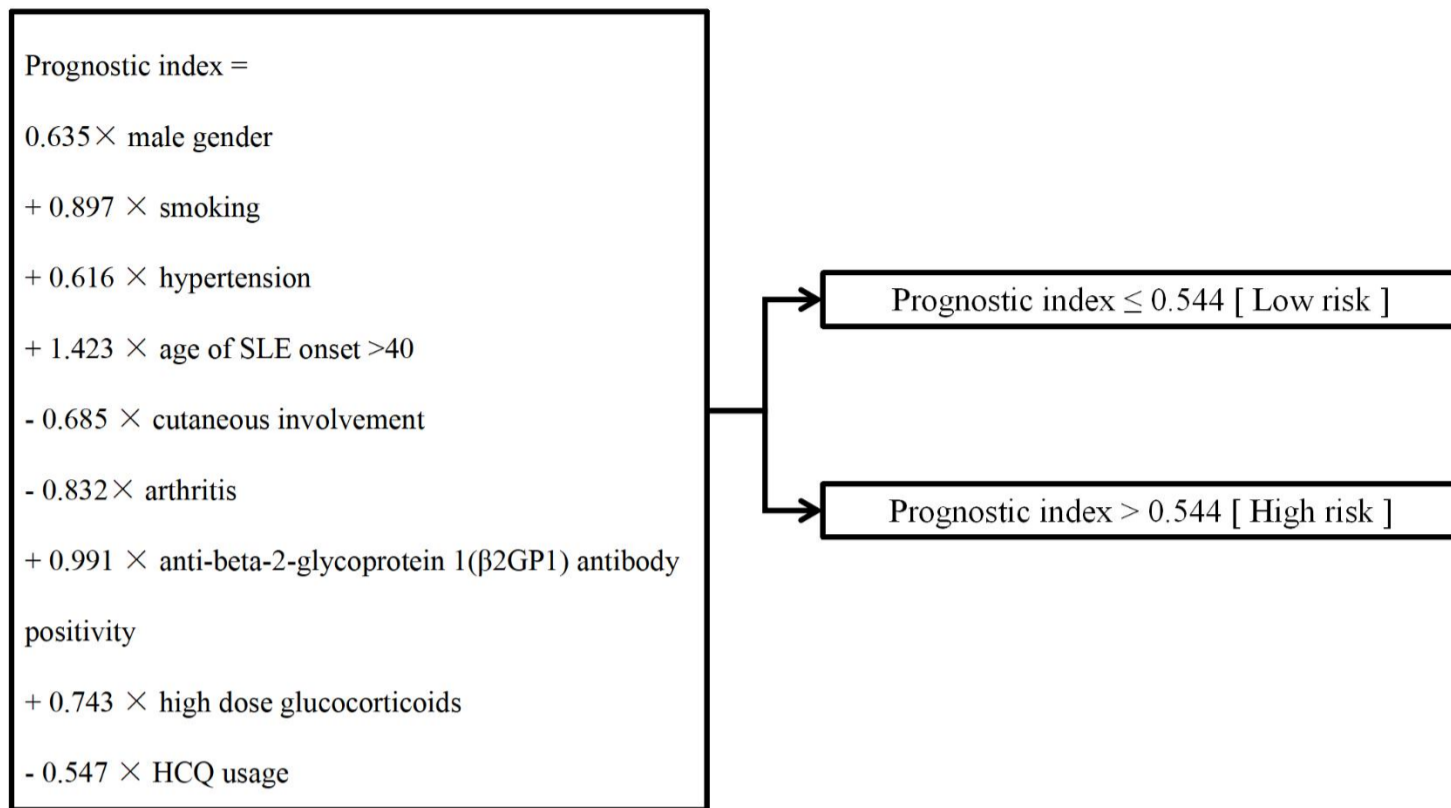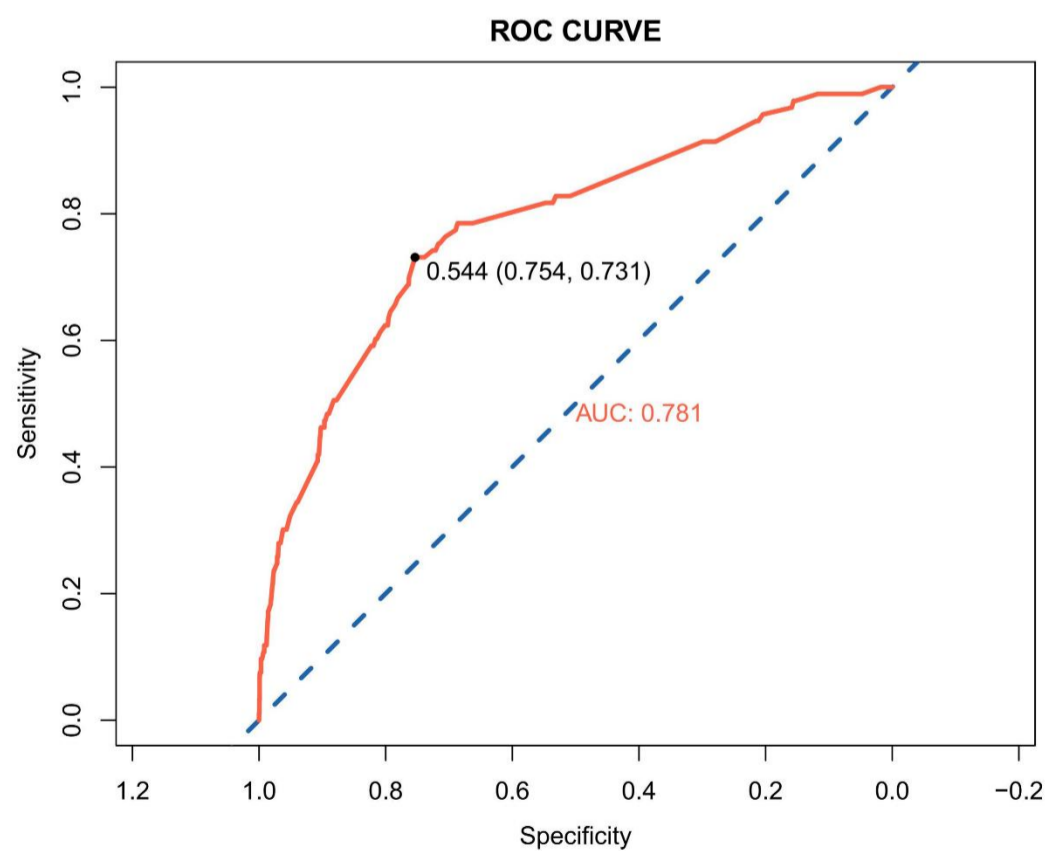

Supplementary Figure 2 ROC curve of the model

## Reference

1. Yancy, W. S., Olsen, M. K., Guyton, J. R., Bakst, R. P. & Westman, E. C. A low-carbohydrate, ketogenic diet versus a low-fat diet to treat obesity and hyperlipidemia: a randomized, controlled trial. *Ann Intern Med* **140**, 769–777 (2004).
2. American Diabetes Association. (2) Classification and diagnosis of diabetes. *Diabetes Care* **38 Suppl**, S8–S16 (2015).
3. Petri, M. *et al.* Derivation and validation of the Systemic Lupus International Collaborating Clinics classification criteria for systemic lupus erythematosus. *Arthritis Rheum* **64**, 2677–2686 (2012).
